# Supplementary material
Source: publisher figshare collection journal article supplement (https://tandf.figshare.com/ndownloader/files/31470115)
Supplement: Supplementary file 1 [file 31470115]

.travis.yml
README.org
build.sh
